# Supplementary material
Source: MDPI journal article supplement (https://www.mdpi.com/2227-9717/8/10/1228)
Supplement: s1 [file s1]

## Supplementary Material

**Table S1.** Analysis of variance (ANOVA) of the estimated regression models for enzymatic cream demulsification for the AEP cream

| Source of variation | Sum of squares | Degrees of freedom | Mean of squares | F <sub>calculated</sub> | F <sub>table</sub> |
|---------------------|----------------|--------------------|-----------------|-------------------------|--------------------|
| Regression          | 951.5          | 2                  | 475.8           | 25.4                    | 4.5                |
| Residue             | 149.9          | 8                  | 18.7            |                         |                    |
| Lack of fit         | 124.3          | 6                  | 20.7            | 1.6                     | 19.3               |
| Pure error          | 25.6           | 2                  | 12.8            |                         |                    |
| Total               | 1101.4         | 10                 |                 |                         |                    |

**Table S2.** Analysis of variance (ANOVA) of the estimated regression models for chemical cream demulsification for the AEP cream

| <b>Source of variation *</b> | <b>Sum of squares</b> | <b>Degrees of freedom</b> | <b>Mean of squares</b> | <b>F<sub>calculated</sub></b> | <b>F<sub>table</sub></b> |
|------------------------------|-----------------------|---------------------------|------------------------|-------------------------------|--------------------------|
| Regression                   | 796.3                 | 4                         | 199.1                  | 22.1                          | 4.3                      |
| Residue                      | 53.7                  | 6                         | 9.0                    |                               |                          |
| Lack of fit                  | 45.7                  | 4                         | 11.4                   | 2.9                           | 19.3                     |
| Pure error                   | 8.0                   | 2                         | 4.0                    |                               |                          |
| Total                        | 850.0                 | 10                        |                        |                               |                          |
